# Supplementary material for: Machine Assisted Experimentation of Extrusion-Based Bioprinting Systems
Source: MDPI journal article supplement (doi:10.3390/mi12070780), 2021-06-30
Supplement: s1 [file s1]

# Supplementary Materials: Machine Assisted Experimentation of Extrusion-based Bioprinting Systems

Shuyu Tian, Rory Stevens, Bridget T. McInnes, and Nastassja A. Lewinski

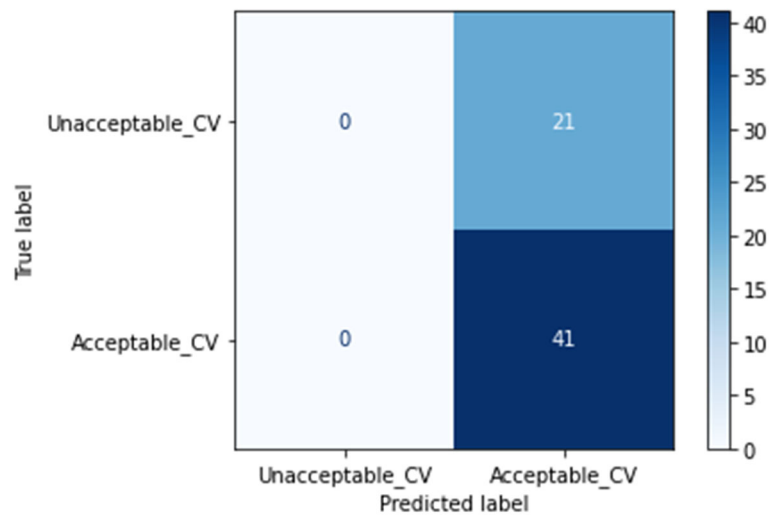

**Figure S1.** Confusion matrix of logistic regression and support vector classification of cell viability. 10% of the cell viability dataset was used as testing data while 90% of the dataset was used as training data. CV indicates cell viability.

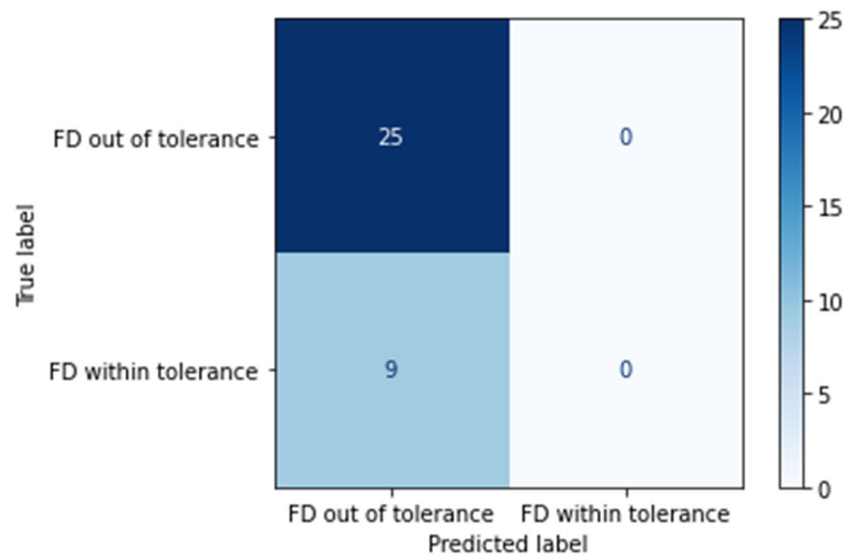

**Figure S2.** Confusion matrix of support vector classification of filament diameter. 10% of the cell viability dataset was used as testing data while 90% of the dataset was used as training data. FD indicates filament diameter.

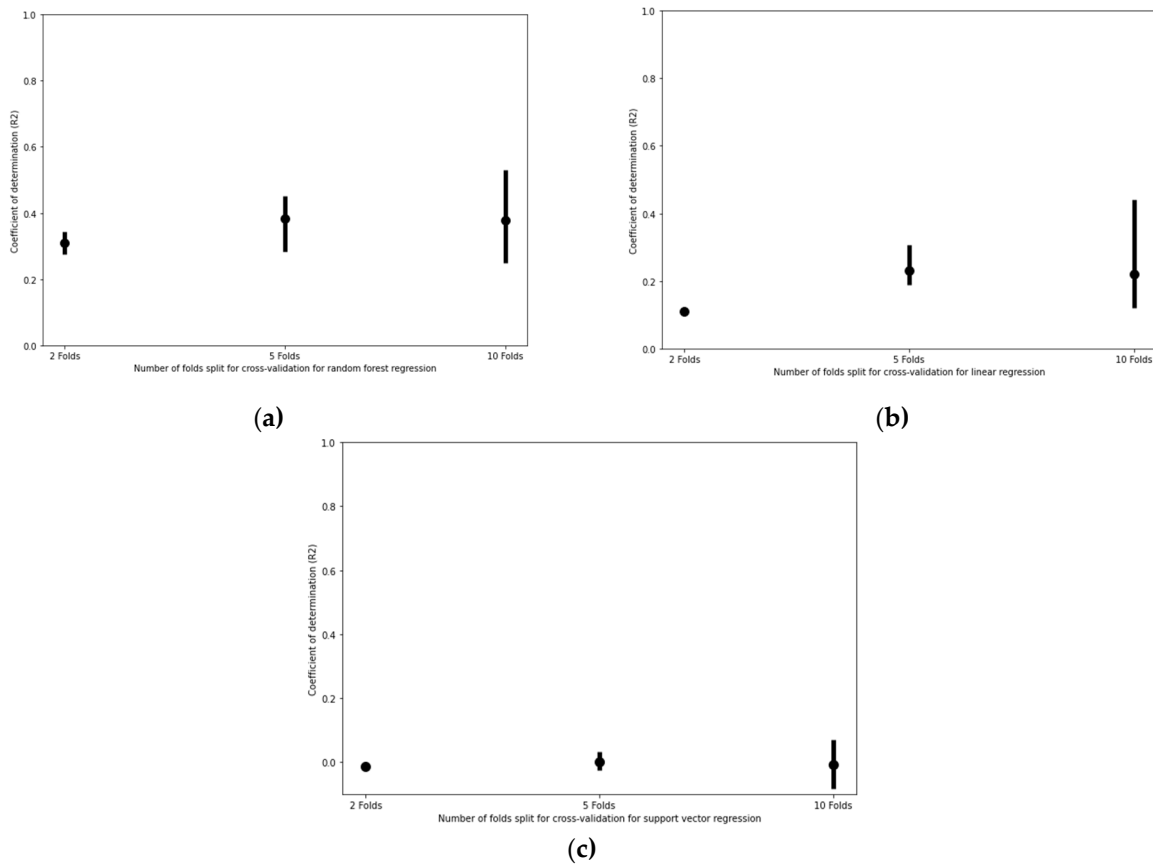

**Figure S3.** Coefficient of determination ( $R^2$ ) values of cell viability regression models based on the number of folds tested for **a)** random forest regression, **b)** linear regression, and **c)** support vector regression. The upper and lower bounds of the error plots represent the maximum and minimum  $R^2$  values produced for each fold division.

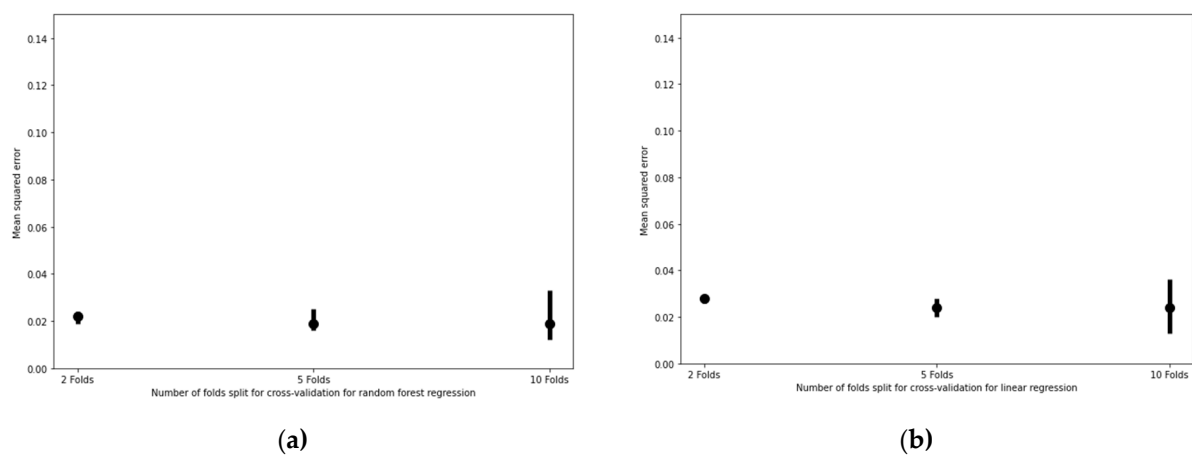

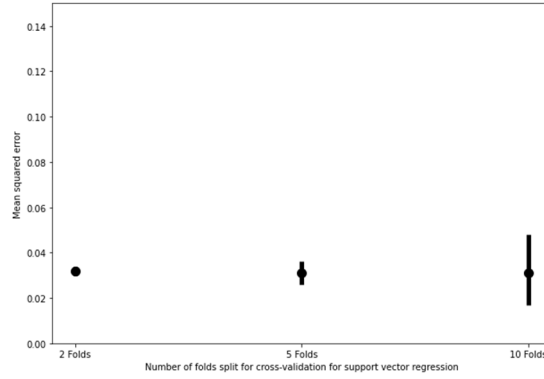

(c)

**Figure S4.** Mean squared error values of cell viability regression models based on the number of folds tested for **a)** random forest regression, **b)** linear regression, and **c)** support vector regression. The upper and lower bounds of the error plots represent the maximum and minimum mean square error values produced for each fold division.

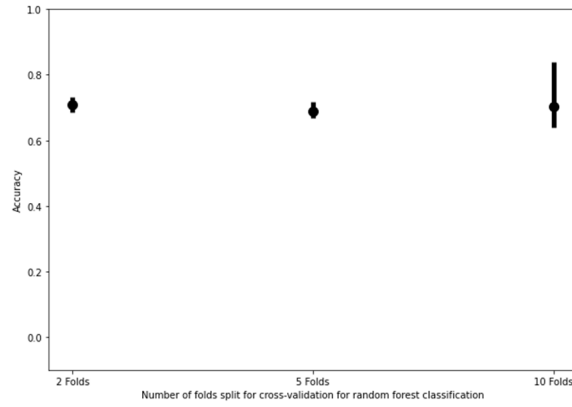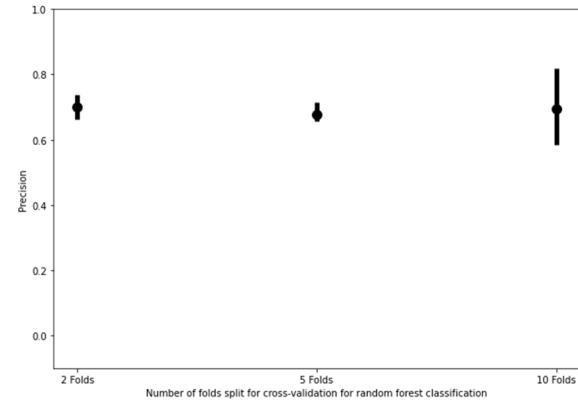

(a)

(b)

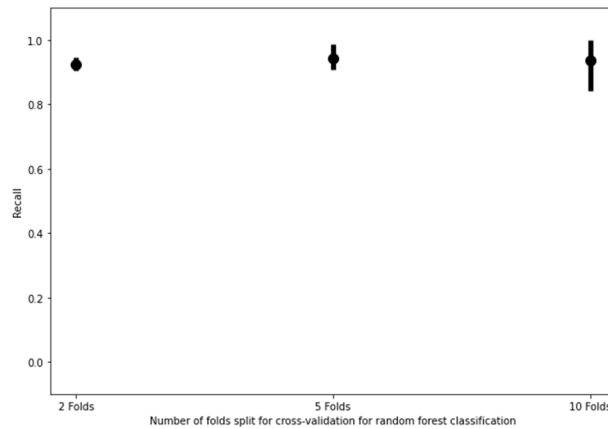

(c)

**Figure S5.** **a)** Accuracy, **b)** precision, and **c)** recall performance of the random forest classification cell viability model on different k-fold cross validation tests. The upper and lower bounds of the error plots represent the maximum and minimum metric values produced for each fold division.

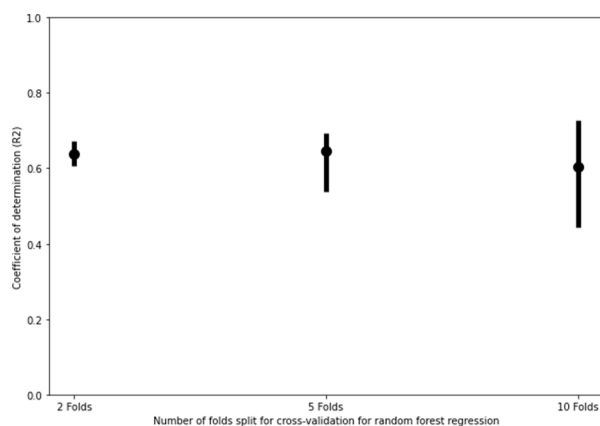

(a)

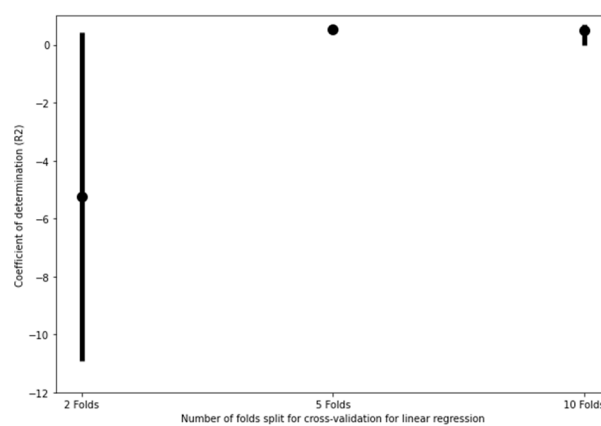

(b)

**Figure S6.** Coefficient of determination ( $r^2$ ) scores of filament diameter regression models based on the number of folds tested for **a)** random forest regression and **b)** linear regression. The upper and lower bounds of the error plots represent the maximum and minimum  $r^2$  produced for each fold division.

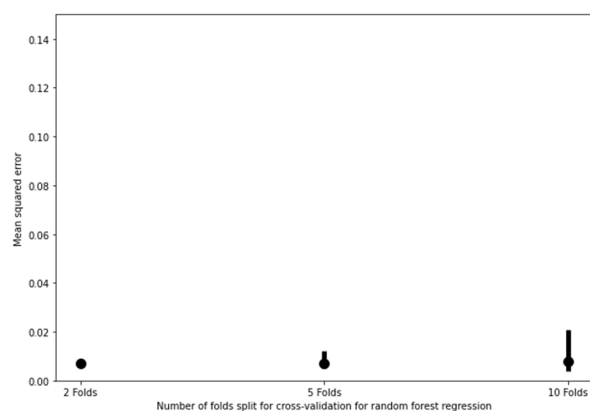

(a)

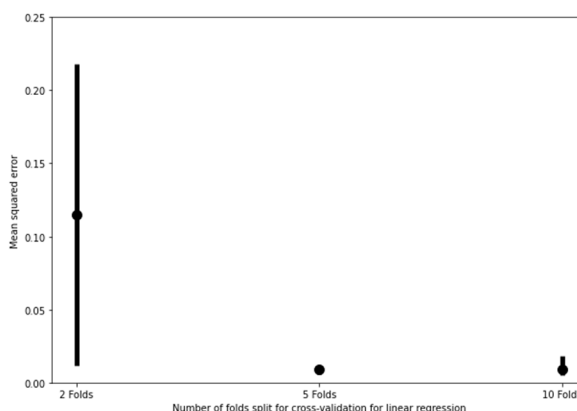

(b)

**Figure S7.** Mean squared error scores of filament diameter regression models based on the number of folds tested for **a)** random forest regression and **b)** linear regression. The upper and lower bounds of the error plots represent the maximum and minimum mean squared error produced for each fold division.

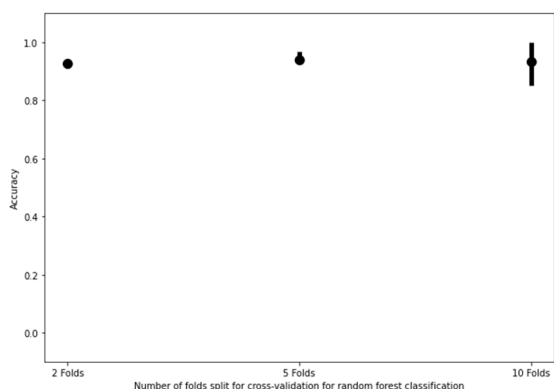

(a)

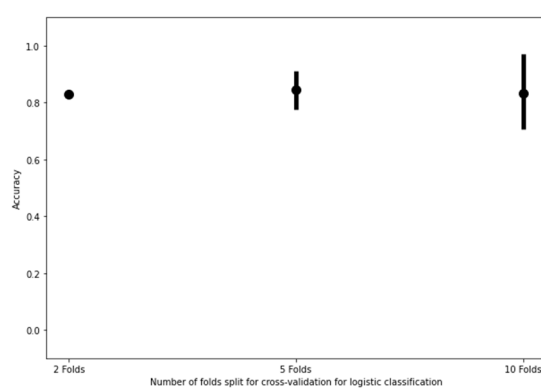

(b)

**Figure S8.** Accuracy scores of filament diameter classification models based on the number of folds tested for **B)** random forest regression and **B)** logistic regression models. The upper and lower bounds of the error plots represent the maximum and minimum accuracy produced for each fold division.

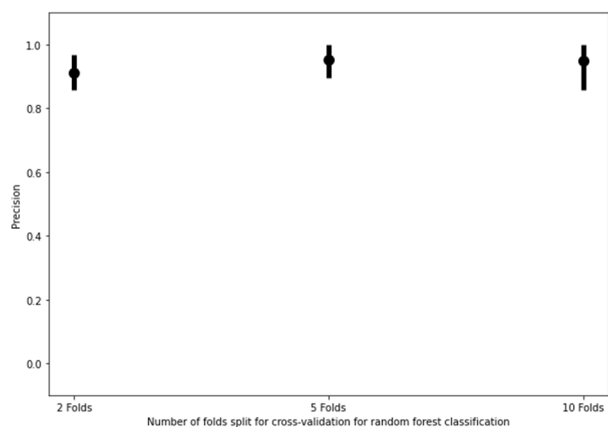

(a)

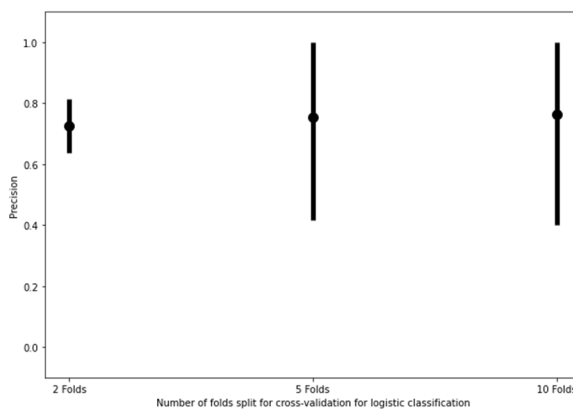

(b)

**Figure S9.** Precision scores of filament diameter classification models based on the number of folds tested for **B)** random forest regression and **B)** logistic regression models. The upper and lower bounds of the error plots represent the maximum and minimum precision produced for each fold division.

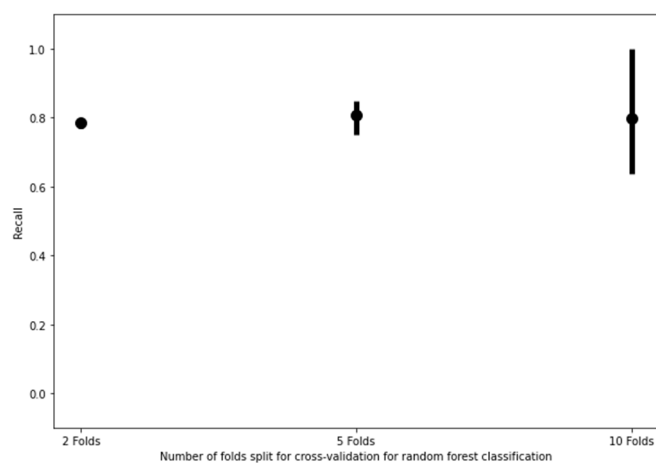

(a)

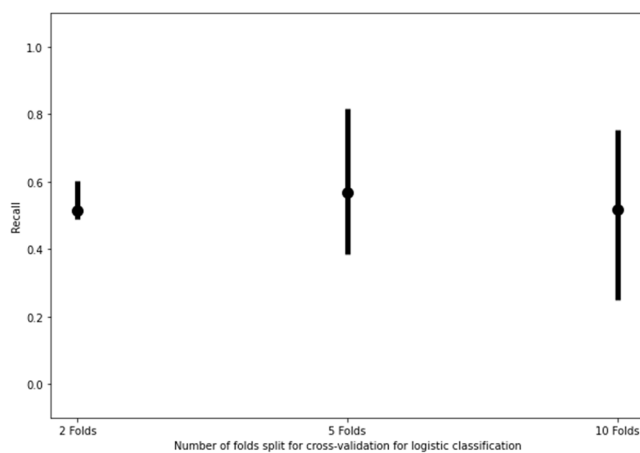

(b)

**Figure S10.** Recall scores of filament diameter classification models based on the number of folds tested for **A)** random forest regression and **B)** logistic regression models. The upper and lower bounds of the error plots represent the maximum and minimum recall produced for each fold division.

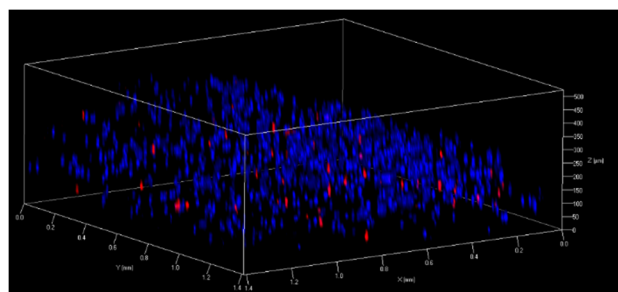

(a)

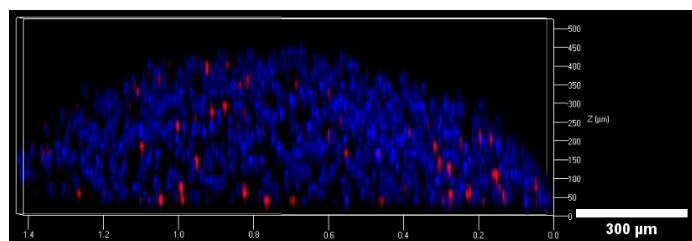

(b)

**Figure S11.** Z-stack total/dead imaging of a portion of a filament from a 3/4 Alg/Gel printed construct (nozzle geometry = conical, nozzle diameter = 410  $\mu\text{m}$ ). An **A)** isometric view, **B)** cross-sectional view in the X-Z plane, and **C)** top view in the X-Y plane are shown at a magnification of 10x.

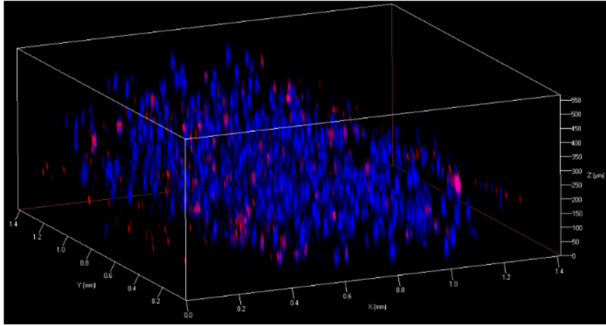

(a)

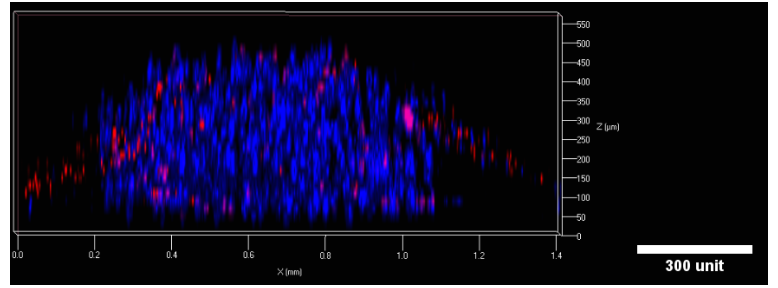

(b)

**Figure S12.** Z-stack total/dead imaging of a portion of a filament from a 3/7 Alg/Gel printed construct (nozzle geometry = conical, nozzle diameter = 410  $\mu\text{m}$ ). An **A**) isometric view, **B**) cross-sectional view in the X-Z plane, and **C**) top view in the X-Y plane are shown at a magnification of 10x.

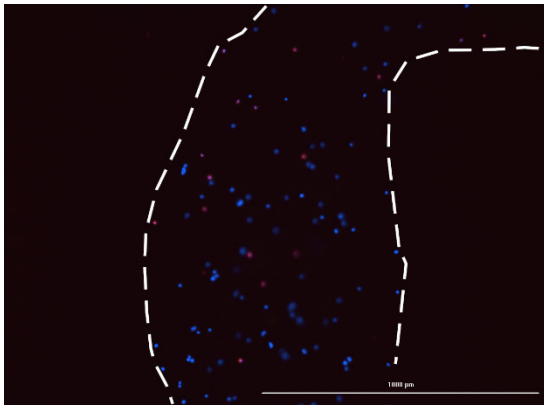

(a)

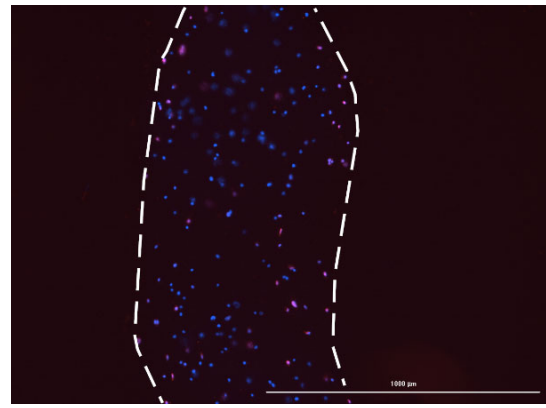

(b)

**Figure S13.** Live/dead images taken on through the imaging plate reader immediately after extrusion of **a**) 3/4 Alg/Gel and **b**) 3/7 Alg/Gel. White borders indicate boundaries of the filament. The magnification of the images is at 4x.

**Table S1.** Predicted cell viability acceptability and actual cell viability acceptability comparison of 3/4 and 3/7 Alg/Gel constructs printed (nozzle geometry = conical, nozzle diameter = 410  $\mu\text{m}$ ).

| Cell viability prediction model | Material concentration (%w/v) | Predicted cell viability acceptability (Yes/No) | Actual cell viability acceptability (Yes/No) |
|---------------------------------|-------------------------------|-------------------------------------------------|----------------------------------------------|
| Random forest classification    | 3/4 Alg/Gel                   | Yes                                             | Yes                                          |
|                                 | 3/7 Alg/Gel                   | Yes                                             | No                                           |
| Logistic regression             | 3/4 Alg/Gel                   | Yes                                             | Yes                                          |
|                                 | 3/7 Alg/Gel                   | Yes                                             | No                                           |
| Support vector classification   | 3/4 Alg/Gel                   | Yes                                             | Yes                                          |
|                                 | 3/7 Alg/Gel                   | Yes                                             | No                                           |



**Table S2.** Predicted tolerance and actual tolerance comparison of 3/4 and 3/7 Alg/Gel constructs printed (nozzle geometry = conical, nozzle diameter = 410  $\mu\text{m}$ ).

| Filament diameter prediction model | Material concentration (%w/v) | Predicted tolerance condition | Percent error from nozzle diameter (410 $\mu\text{m}$ ) (%) | Actual tolerance condition |
|------------------------------------|-------------------------------|-------------------------------|-------------------------------------------------------------|----------------------------|
| Random forest classification       | 3/4 Alg/Gel                   | Not within tolerance          | 126                                                         | Not within tolerance       |
|                                    | 3/7 Alg/Gel                   | Not within tolerance          | 72.5                                                        | Not within tolerance       |
| Logistic regression                | 3/4 Alg/Gel                   | Not within tolerance          | 126                                                         | Not within tolerance       |
|                                    | 3/7 Alg/Gel                   | Not within tolerance          | 72.5                                                        | Not within tolerance       |
| Support vector classification      | 3/4 Alg/Gel                   | Not within tolerance          | 126                                                         | Not within tolerance       |
|                                    | 3/7 Alg/Gel                   | Not within tolerance          | 72.5                                                        | Not within tolerance       |

**Table S3.** Predicted extrusion pressure classifications compared against experimental outcomes for corresponding material concentrations of Alg/Gel. Actual values represent the mean  $\pm$  standard deviation for all samples (n = number of batches).

| Extrusion pressure prediction Model | Material and material concentration (%w/v) | Acceptable extrusion pressure predicted (Yes/No) | Actual extrusion pressure acceptability (Yes/No) |
|-------------------------------------|--------------------------------------------|--------------------------------------------------|--------------------------------------------------|
| Random forest classification        | 3/4 Alg/Gel                                | Yes                                              | Yes                                              |
|                                     | 3/7 Alg/Gel                                | No                                               | Yes                                              |
|                                     | 8/20 Alg/Gel                               | No                                               | No                                               |
| Logistic regression                 | 3/4 Alg/Gel                                | Yes                                              | Yes                                              |
|                                     | 3/7 Alg/Gel                                | Yes                                              | Yes                                              |
|                                     | 8/20 Alg/Gel                               | Yes                                              | No                                               |
| Support vector classification       | 3/4 Alg/Gel                                | Yes                                              | Yes                                              |
|                                     | 3/7 Alg/Gel                                | Yes                                              | Yes                                              |
|                                     | 8/20 Alg/Gel                               | Yes                                              | No                                               |
